# Supplementary material for: Micelle modified-carbon nanosphere enhanced chemiluminescence from reactive oxygen species for the detection of hydrogen peroxide
Source: Royal Society of Chemistry journal article supplement (doi:10.1039/c5ay01302j), 2015-01-01
Supplement: c5ay01302j1.pdf [file c5ay01302j1.pdf]

**Supporting Information for:**

Micelle modified–carbon nanosphere enhanced chemiluminescence from reactive oxygen species for the detection of hydrogen peroxide

By Feng Pan,<sup>a\*</sup> Pengkun Wei,<sup>a</sup> Manlin Zhang,<sup>b</sup> Chao Lu<sup>b\*</sup>

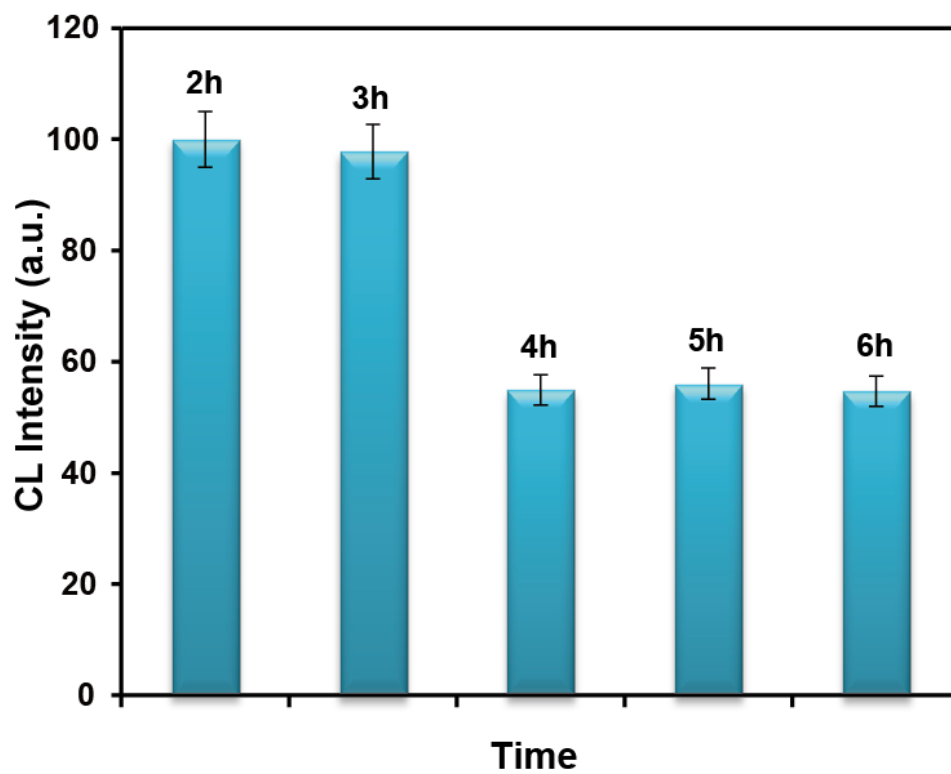

**Fig. S1** Effect of the preparation time of CNS on the CL intensity of the  $\text{Co(II)}\text{-H}_2\text{O}_2\text{-OH}^-$  system.

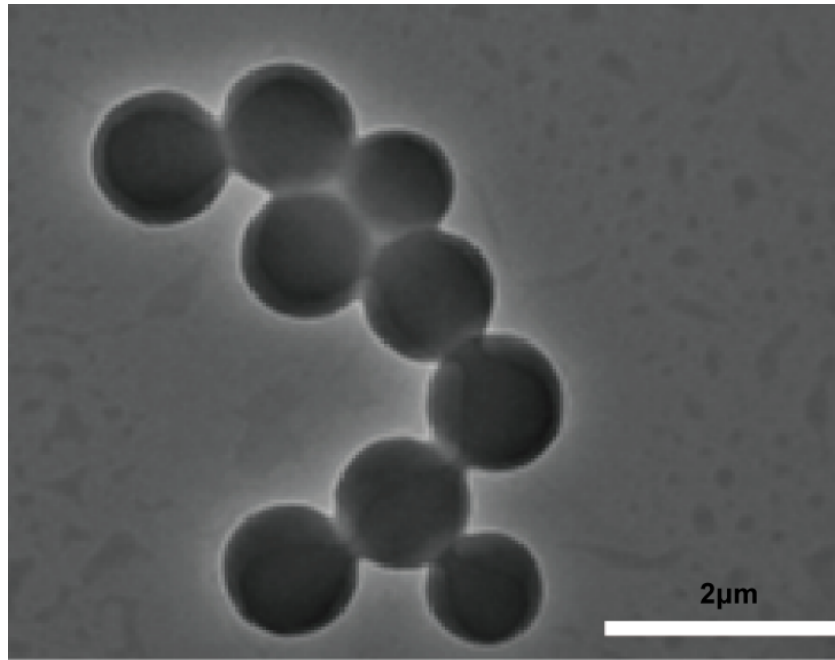

**Fig. S2** TEM image of CNS.

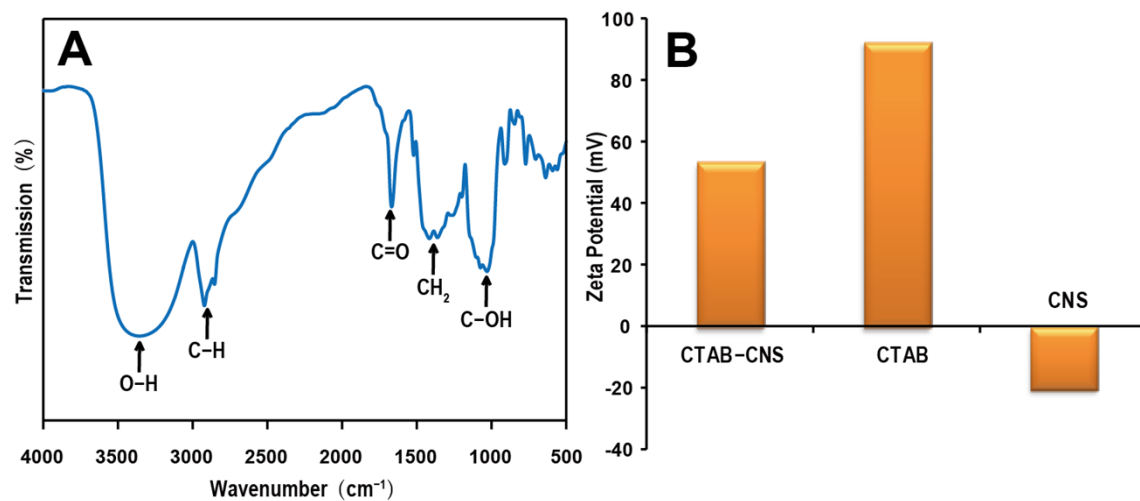

**Fig. S3** (A) FTIR spectrum of the as-prepared CTAB-CNS; (B) Zeta potential measurements of CTAB-CNS, 4.0 mM CTAB and CNS, respectively.

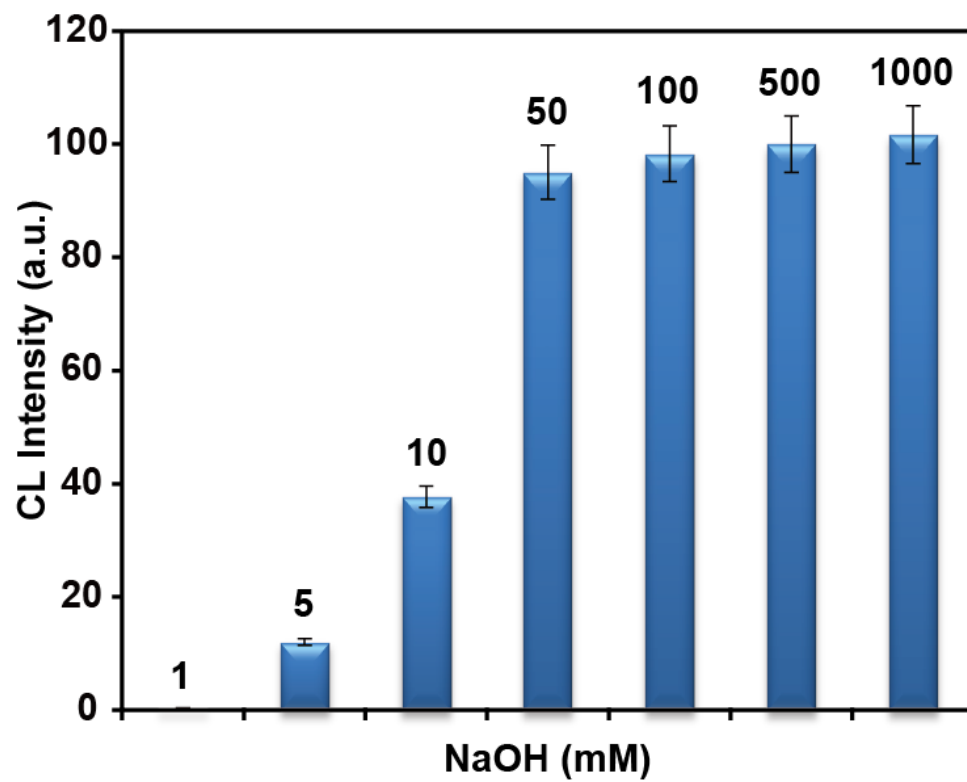

**Fig. S4** Effect of NaOH on the CL intensity of the Co(II)-H<sub>2</sub>O<sub>2</sub>-OH<sup>-</sup> system.

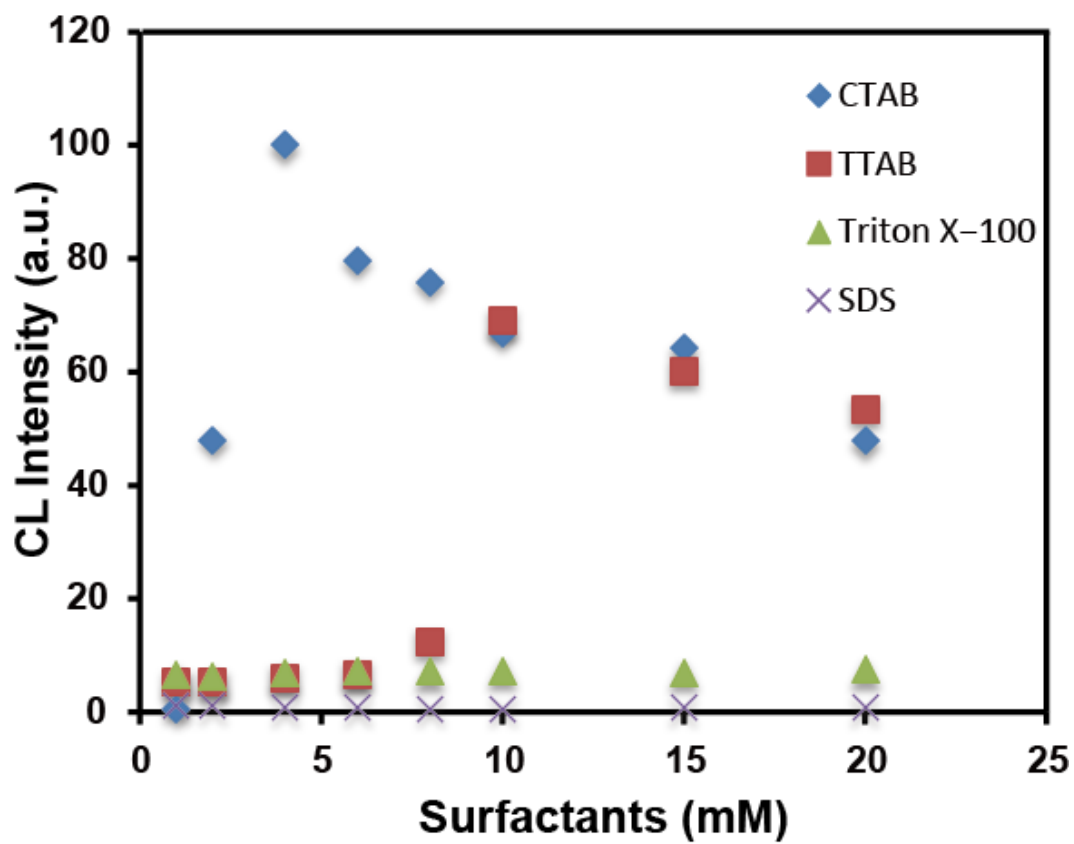

**Fig. S5** Effect of CNS modified with CTAB, TTAB, SDS and Triton X-100 on CL intensity of the Co(II)-H<sub>2</sub>O<sub>2</sub>-OH<sup>-</sup> system.

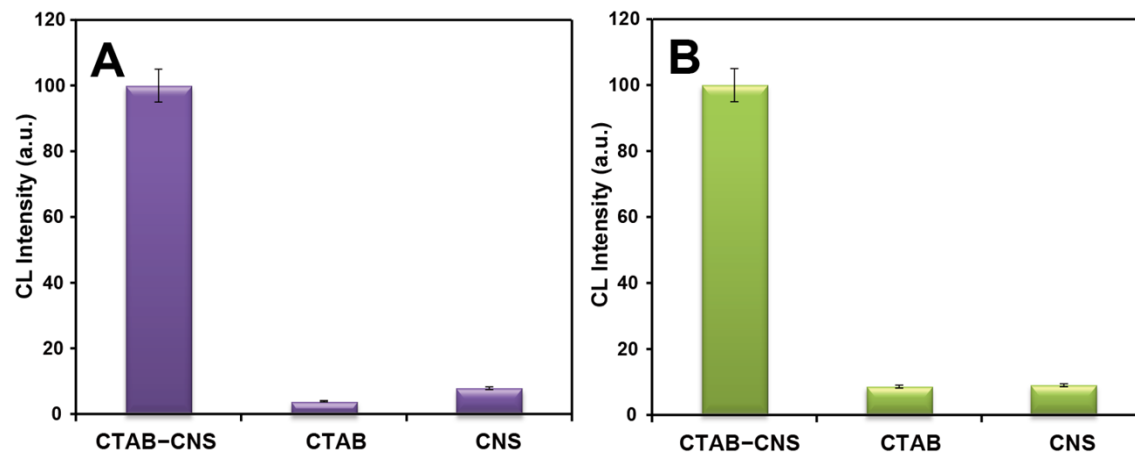

**Fig. S6** (A) CL intensity of the  $\text{ClO}^-$  system in the presence of CTAB-CNS, 4 mM CTAB and CNS, respectively; (B) CL intensity of the  $\text{ONOO}^-$  system in the presence of CTAB-CNS, 4.0 mM CTAB and CNS, respectively.

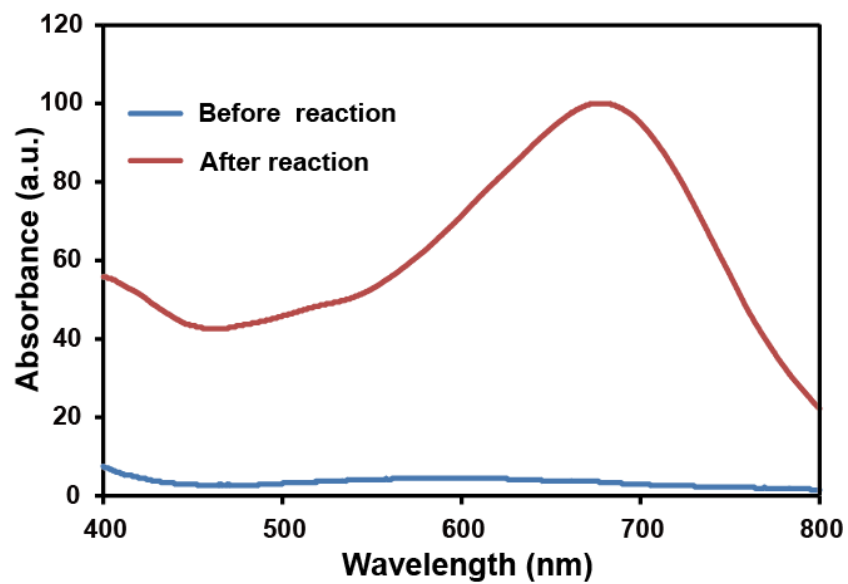

**Fig. S7** Absorbance spectra of NBT in the absence or presence of the CTAB-CNS-Co(II)-H<sub>2</sub>O<sub>2</sub>-OH<sup>-</sup> system.



**Table S1** Tolerance limit of various coexistent substances on the determination of 50  $\mu\text{M}$   $\text{H}_2\text{O}_2$ 

| Species added                                                                                                                                                                                                             | Maximum tolerance ratio of ion to $\text{H}_2\text{O}_2$ (molar ratio) |
|---------------------------------------------------------------------------------------------------------------------------------------------------------------------------------------------------------------------------|------------------------------------------------------------------------|
| $\text{Na}^+$ , $\text{K}^+$ , $\text{Ba}^{2+}$ , $\text{Ca}^{2+}$ , $\text{Zn}^{2+}$ , $\text{NH}_4^+$ , $\text{Cl}^-$ , $\text{F}^-$ , $\text{Br}^-$ , $\text{NO}_3^-$ , $\text{SO}_4^{2-}$ , $\text{CH}_3\text{COO}^-$ | 100                                                                    |
| $\text{Al}^{3+}$ , $\text{Cd}^{2+}$ , $\text{Fe}^{3+}$ , $\text{Mg}^{2+}$ , $\text{Ag}^+$                                                                                                                                 | 50                                                                     |
| $\text{PO}_4^{3-}$ , $\text{Mn}^{2+}$                                                                                                                                                                                     | 10                                                                     |
| $\text{Cu}^{2+}$ , $\text{Fe}^{2+}$ , $\text{ClO}^-$                                                                                                                                                                      | 5                                                                      |

**Table S2** Effects of radical scavengers on CTAB–CNS–Co(II) –H<sub>2</sub>O<sub>2</sub>–OH<sup>–</sup> system<sup>a</sup>

| Radical scavengers | Concentration (mM) | CL intensity <sup>b</sup> |
|--------------------|--------------------|---------------------------|
| H <sub>2</sub> O   |                    | 100                       |
| NaN <sub>3</sub>   | 1.0mM              | 100                       |
| NBT                | 10mM               | 21                        |
| Thiourea           | 50mM               | 44                        |
| Ascorbic acid      | 0.1mM              | 27                        |

<sup>a</sup> 0.05M H<sub>2</sub>O<sub>2</sub>, 0.05M NaOH, CTAB–CNS, 0.1 mM Co(II). The volume of CTAB–CNS, NaOH or H<sub>2</sub>O<sub>2</sub> was 100 μL. The volume of Co(II) was 5 μL.

<sup>b</sup> All of the results were the mean of three determinations.
